# Supplementary material
Source: Springer Nature journal article supplement (https://www.springermedizin.de/resource/supplementary/12891_2013_1914_MOESM2_ESM.docx/9508768)
Supplement: MOESM2 [file 9508768]

**Table 2: Bazaz Dysphagia Scale**

| **Do you experience difficulty swallowing?**   - None; no episode of swallowing difficulty - Mild; experienced only rare episodes of dysphagia and not considered a significant problem - Moderate; occasional swallowing difficulty with specific foods (e.g., bread, steak) - Severe; frequent difficulty swallowing (e.g., with the majority of foods) |
| --- |
